# Supplementary material for: Room-temperature solution-processed and metal oxide-free nano-composite for the flexible transparent bottom electrode of perovskite solar cells
Source: Royal Society of Chemistry journal article supplement (doi:10.1039/c6nr00011h), 2016-01-01
Supplement: c6nr00011h1.pdf [file c6nr00011h1.pdf]

## Room-temperature solution-processed and metal oxide-free nano-composite for the flexible transparent bottom electrode of perovskite solar cells

Haifei Lu, Jingsong Sun, Hong Zhang, Shunmian Lu, Wallace C.H. Choy\*

Department of Electrical and Electronic Engineering, The University of Hong Kong,  
Pokfulam Road, Hong Kong SAR, P. R. China

E-mail: [chchoy@eee.hku.hk](mailto:chchoy@eee.hku.hk)

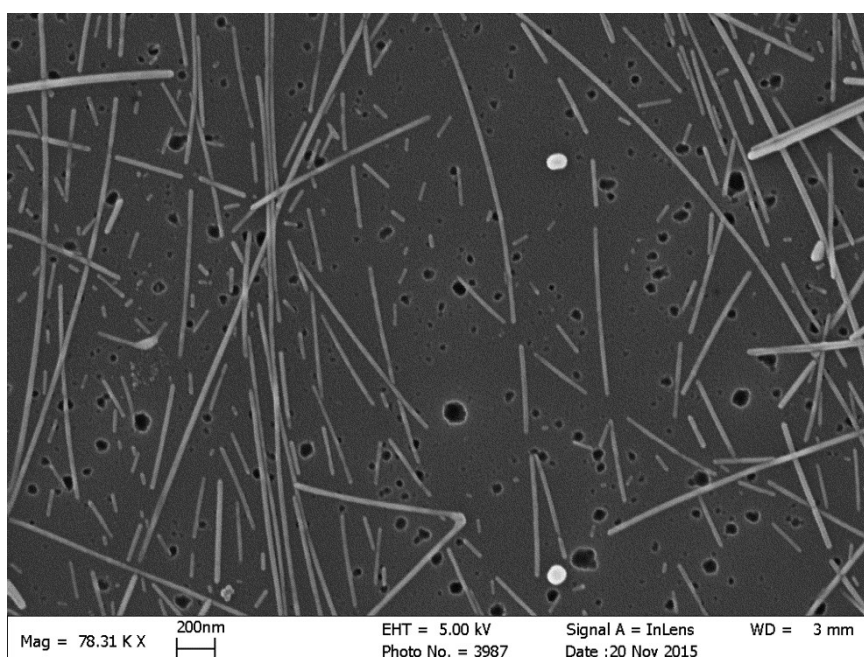

**Figure S1.** SEM image of silver nanowire electrode after spin-coating MAI solution (50 mg/ml in IPA), which was subsequently washed by IPA to remove excess MAI molecules.

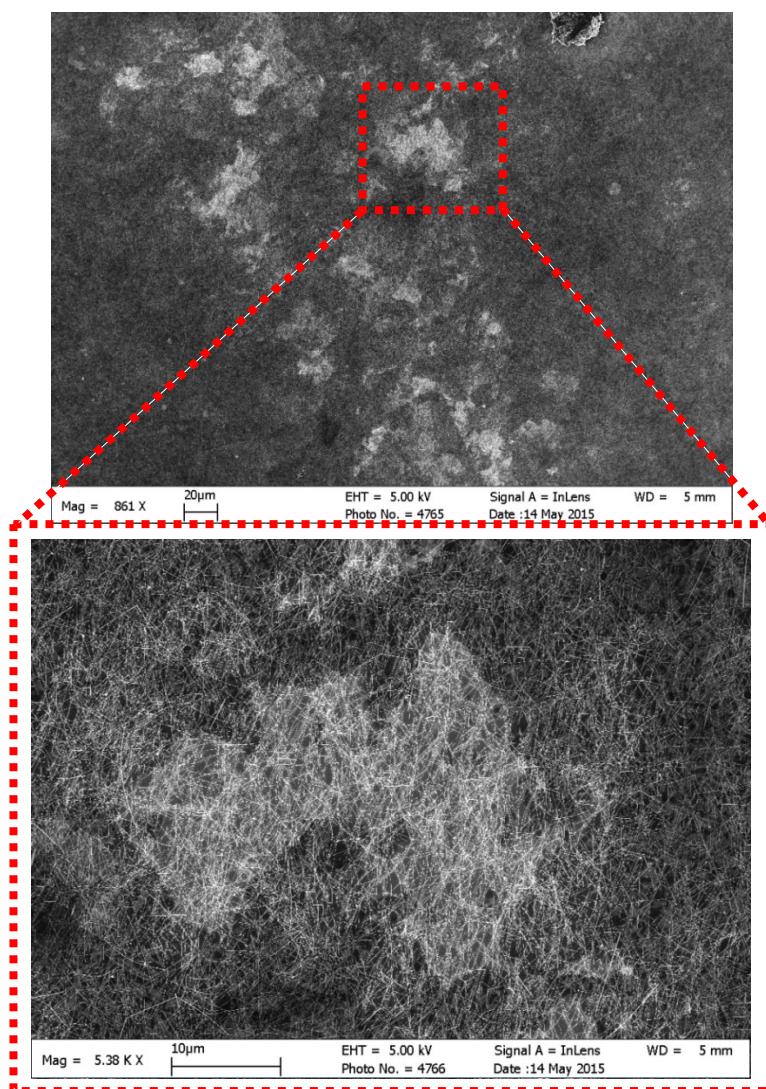

**Figure S2.** Large-scale SEM image of silver nano-network covered by 10  $\mu\text{L}$  pristine GO solution (0.25 mg/mL), indicating the incomplete coverage of GO film on the electrode.

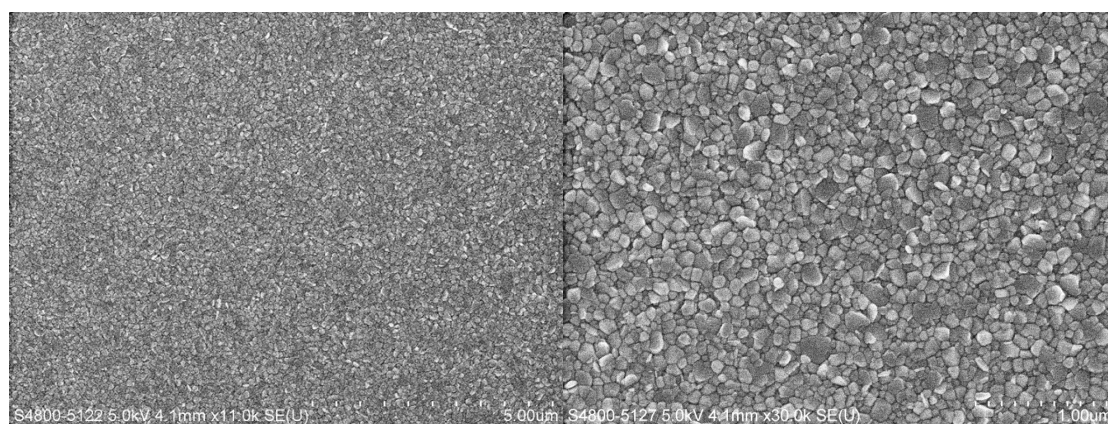

**Figure S3.** SEM images of the perovskite film with different magnification prepared on the nano-composite electrode.

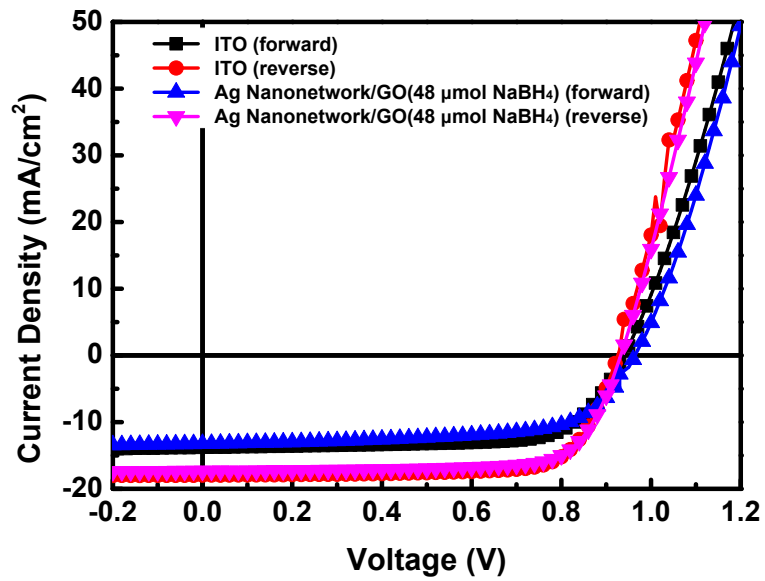

**Figure S4.** J-V curves of perovskite solar cells on the transparent electrodes of ITO and nano-composite electrode of Ag Nano-network/GO (48  $\mu\text{mol NaBH}_4$ ) measured under forward and reverse bias scanning.
